# Supplementary material
Source: publisher figshare collection journal article supplement (https://sage.figshare.com/ndownloader/files/17763434)
Supplement: Supplementary file 1 [file 17763434]

## Sheet: Prisma Checklist
Section/topic	#	Checklist item	Reported on page #
TITLE
Title	1	Identify the report as a systematic review, meta-analysis, or both.	1
ABSTRACT
Structured summary	2	Provide a structured summary including, as applicable: background; objectives; data sources; study eligibility criteria, participants, and interventions; study appraisal and synthesis methods; results; limitations; conclusions and implications of key findings; systematic review registration number.	2 to 3
INTRODUCTION
Rationale	3	Describe the rationale for the review in the context of what is already known.	4
Objectives	4	Provide an explicit statement of questions being addressed with reference to participants, interventions, comparisons, outcomes, and study design (PICOS).	9
METHODS
Protocol and registration	5	Indicate if a review protocol exists, if and where it can be accessed (e.g., Web address), and, if available, provide registration information including registration number.	1
Eligibility criteria	6	Specify study characteristics (e.g., PICOS, length of follow-up) and report characteristics (e.g., years considered, language, publication status) used as criteria for eligibility, giving rationale.	9
Information sources	7	Describe all information sources (e.g., databases with dates of coverage, contact with study authors to identify additional studies) in the search and date last searched.	8
Search	8	Present full electronic search strategy for at least one database, including any limits used, such that it could be repeated.	8
Study selection	9	State the process for selecting studies (i.e., screening, eligibility, included in systematic review, and, if applicable, included in the meta-analysis).	8 to 13
Data collection process	10	Describe method of data extraction from reports (e.g., piloted forms, independently, in duplicate) and any processes for obtaining and confirming data from investigators.	8
Data items	11	List and define all variables for which data were sought (e.g., PICOS, funding sources) and any assumptions and simplifications made.	8 to 13
Risk of bias in individual studies	12	Describe methods used for assessing risk of bias of individual studies (including specification of whether this was done at the study or outcome level), and how this information is to be used in any data synthesis.	10
Summary measures	13	State the principal summary measures (e.g., risk ratio, difference in means).	10 to 13
Synthesis of results	14	Describe the methods of handling data and combining results of studies, if done, including measures of consistency (e.g., I2) for each meta-analysis.	10 to 13
Risk of bias across studies	15	Specify any assessment of risk of bias that may affect the cumulative evidence (e.g., publication bias, selective reporting within studies).	10
Additional analyses	16	Describe methods of additional analyses (e.g., sensitivity or subgroup analyses, meta-regression), if done, indicating which were pre-specified.	N/A
RESULTS
Study selection	17	Give numbers of studies screened, assessed for eligibility, and included in the review, with reasons for exclusions at each stage, ideally with a flow diagram.	13 and 38
Study characteristics	18	For each study, present characteristics for which data were extracted (e.g., study size, PICOS, follow-up period) and provide the citations.	9
Risk of bias within studies	19	Present data on risk of bias of each study and, if available, any outcome level assessment (see item 12).	39
Results of individual studies	20	For all outcomes considered (benefits or harms), present, for each study: (a) simple summary data for each intervention group (b) effect estimates and confidence intervals, ideally with a forest plot.	N/A
Synthesis of results	21	Present results of each meta-analysis done, including confidence intervals and measures of consistency.	N/A
Risk of bias across studies	22	Present results of any assessment of risk of bias across studies (see Item 15).	38
Additional analysis	23	Give results of additional analyses, if done (e.g., sensitivity or subgroup analyses, meta-regression [see Item 16]).	40 and 41
DISCUSSION
Summary of evidence	24	Summarize the main findings including the strength of evidence for each main outcome; consider their relevance to key groups (e.g., healthcare providers, users, and policy makers).	16 to 21
Limitations	25	Discuss limitations at study and outcome level (e.g., risk of bias), and at review-level (e.g., incomplete retrieval of identified research, reporting bias).	21 to 23
Conclusions	26	Provide a general interpretation of the results in the context of other evidence, and implications for future research.	16 to 24
FUNDING
Funding	27	Describe sources of funding for the systematic review and other support (e.g., supply of data); role of funders for the systematic review.	1 and 27
From: Moher D, Liberati A, Tetzlaff J, Altman DG, The PRISMA Group (2009). Preferred Reporting Items for Systematic Reviews and Meta-Analyses: The PRISMA Statement. PLoS Med 6(7): e1000097. doi:10.1371/journal.pmed1000097

## Sheet: Downs and Black Scale
First author (year)		Clear hypothesis, aim or objective.	Main outcomes to be measured clearly described.	Characteristics of the included subjects clearly described.	Interventions of interest clearly described.	Dstributions of principal confounders in each group clearly described.	Main ﬁndings of the study clearly described.	Estimates of random variability provided for the main outcomes.	All important adverse events of the intervention reported.	Characteristics of patients lost to follow-up described.	Actual probability values reported.	Subtotal	Subjects asked to participate representative of the entire population.	Subjects prepared to participate representative of the entire population.	Treatment staff, and facilities representative of the treatment the majority of patients.	Subtotal	Those measuring the main outcomes attempted to be blinded.	Any “data dredging” was made clear.	Analyses adjust for different lengths of follow-up of subjects.	Statistical tests used for main outcomes appropriate.	Compliance with the intervention/s reliable.	Main outcome measures accurate (valid and reliable).	Subtotal	Subjects in different intervention groups recruited from the same population.	Subjects in different intervention groups recruited over the same period of time.	Subjects randomised to intervention groups.	Assignment concealed from boh patients and heath care until recrutment is over.	Adequate adjustment for confounding in the analyses for the main ﬁndings.	Losses of subjects to follow-up taken into account.	Subtotal	Total Score
Possible answers	Sample size	Yes : 1 ; No : 0	Yes : 1 ; No : 0	Yes : 1 ; No : 0	Yes : 1 ; No : 0	Yes : 2 ; Partially : 1 ; No : 0	Yes : 1 ; No : 0	Yes : 1 ; No : 0	Yes : 1 ; No : 0	Yes : 1 ; No : 0	Yes : 1 ; No : 0		Yes : 1 ; No : 0 ; Unable to determine : 666	Yes : 1 ; No : 0 ; Unable to determine : 666	Yes : 1 ; No : 0 ; Unable to determine : 666		Yes : 1 ; No : 0 ; Unable to determine : 666	Yes : 1 ; No : 0 ; Unable to determine : 666	Yes : 1 ; No : 0 ; Unable to determine : 666	Yes : 1 ; No : 0 ; Unable to determine : 666	Yes : 1 ; No : 0 ; Unable to determine : 666	Yes : 1 ; No : 0 ; Unable to determine : 666		Yes : 1 ; No : 0 ; Unable to determine : 666	Yes : 1 ; No : 0 ; Unable to determine : 666	Yes : 1 ; No : 0 ; Unable to determine : 666	Yes : 1 ; No : 0 ; Unable to determine : 666	Yes : 1 ; No : 0 ; Unable to determine : 666	Yes : 1 ; No : 0 ; Unable to determine : 666		Out of 26 possible points
Allan (2017)	231	1	1	1	1	2	1	1	0	1	0	9	666	666	1	1	1	1	1	1	1	1	6	1	666	1	666	1	1	4	21
Clapp (2016)	109	1	1	0	1	0	1	1	0	1	1	7	666	666	1	1	666	1	1	1	0	1	4	1	666	666	666	0	1	2	15
Currier (2014)	805	1	1	1	0	0	1	1	0	1	1	7	0	666	1	1	666	1	1	1	0	1	4	0	666	666	666	666	1	1	14
Elliott (2005)	2219	1	1	1	1	0	1	1	0	1	0	7	1	666	1	2	666	1	1	1	666	1	4	666	666	666	666	666	1	1	16
Fletcher (2017)	439	1	1	1	0	0	1	1	0	0	0	5	666	666	1	1	666	1	1	1	0	1	4	0	666	0	0	666	1	1	12
Galovski (2016)	69	1	1	1	0	1	1	1	1	1	0	8	666	666	0	0	1	1	666	1	1	1	5	1	666	1	666	1	1	4	17
Phelps (2018)	2686	1	1	1	1	0	1	1	0	1	1	8	666	666	1	1	666	1	1	1	666	1	4	1	1	0	0	0	1	3	17
Rosenkranz (2011)	161	1	1	1	1	1	1	1	0	1	0	8	666	1	1	2	666	1	1	1	0	1	4	666	666	0	0	1	1	2	18
Schumm (2013)	205	1	1	1	0	0	1	1	0	1	0	6	1	666	666	1	0	1	1	1	1	1	5	1	666	0	0	1	1	3	16
Stein (2012)	313	1	1	1	1	2	1	1	0	1	0	9	666	666	666	666	1	1	1	1	1	1	6	1	666	1	666	1	1	4	19
Taylor (2001)	45	1	1	1	1	0	1	1	0	1	0	7	666	666	666	666	1	1	1	1	1	1	6	1	666	0	0	1	1	3	16

## Sheet: Raw Data Collection
	Study Title	Study Authors	Year published	Military or Civilian	Country where the study took place	Study Design	Total Duration of the study	Where and how participants were recruited	When participants were recruited	Allocation Sequence	Blinding of participants	Allocation Concealment to evaluators	Inclusion criteria	Exlcusion criteria	Analytic N	Setting where study took place	Primary Diagnosis	Primary Diagnosis Criteria	Primary Diagnostic Criteria Tool	Type of trauma	Time passed since trauma	Number of traumas	Co-morbidity	Co-morbidity Diagnosis Criteria	Comorbidities Diagnostic Criteria Tools	Who determined elligibility	Sex	Age	Ethnicity	Education	Matrimonial status	Number of intervention groups	Number of participants in each intervention group	Type of psychotherapy	Number of psychotherapy sessions	Duration of psychotherapy sessions	Frequence of psychotherapy sessions	Psychotherapy content	Who administered psychotherapy	Adherence of therapist to treatment	Number of baseline measures	When baseline measures were taken	Outcomes measured at baseline	Number of measures during treatment	When measures were taken during treatment	Outcomes measured during treatment	Number of follow up measures	When follow up measures were taken	Outcomes measured at follow-up
1	Allan, N. P., Gros, D. F., Myers, U. S., Korte, K. J., & Acierno, R. (2017). Predictors and Outcomes of Growth Mixture Modeled Trajectories Across an Exposure‐Based PTSD Intervention With Veterans. Journal of clinical psychology, 73(9), 1048-1063.	Allan, N. P., Gros, D. F., Myers, U. S., Korte, K. J., & Acierno, R.	2017	Military	USA	RCT	666	Recruited at a Veterans' Affairs Medical Center through clinic relerrals	666	Permutted bloc randomization	1	1	1) meet criteria for PTSD or subthreshold PTSD with functional impairement	1) psychosis, 2) acute suicidality, 3) active substance dependence.	231	VA medical center	PTSD or subthreshold PTSD with functional impairement	DSM IV TR	CAPS	Combat related : Operation Enduring Freedom/Iraqi Freedom (56%), Persian Golf War (23,8%), Vietnam (25,5%).	666	666	Being disabled (46,8%), MDD (35,5%) or PD (33,3%).	Vérifier quel critères sont utilisés dans le SCID-I	SCID-I	Master's-level Clinicians	94,4% male	45,7 years old (SD=14,89)	White (50,6%) or Black (47,2%)	12,4 years (SD=4,35)		2 : Behavioral activation and therapeutic exposure (BA-TE) in person or telehealth.	In person (n=121) or telehealth (n=110)	Behavioral activation and therapeutic exposure	8	90 minutes	Weekly	Behavioral activation, situational exposure and imaginal exposure techniques	Master's-level clinicians	Sessions were audio-recorded and rated by an independant rater for fidelity.	1	Baseline	Demographic questionnaire, BAI, BDI-II, Medical Outcomes Study Social Support Survey Form (MOSS), PCL-M, CAPS, SCID-I (MDD and PD modules)	4	sessions 2,4,6 and 8	BDI-II, PCL-M	1	Postintervention	BDI-II, PCL-M
2	Clapp, J. D., Kemp, J. J., Cox, K. S., & Tuerk, P. W. (2016). Patterns of change in response to prolonged exposure: Implications for treatment outcome. Depression and anxiety, 33(9), 807-815.	Clapp, J. D., Kemp, J. J., Cox, K. S., & Tuerk, P. W.	2016	Military	USA	Archival data analysis	March 3 2008 to November 12 2014	Facility wide referrals	666	666	999	0	1) receiving prolonged exposure for PSTD at the VAMC, 2) having at least 3 measures in the first 10 weeks of treatment.	666	109	VA medical center	PTSD	DSM IV	PCL-M	Military related trauma; Vietnam (29,4%), Desert Storm/Desert Shield (14,7%), Operation Enduring Freedom/Operation Iraqi Freedom (44%) and other (military sexual trauma or nondeployment issues (12%)).	666	666	Depression was assessed in 82 participants	Vérifier quel critères sont utilisés dans le BDI-II	BDI-II	Treating clinicians evaluated	81,7% male	47,9 years old (SD=15,3)	Black (39,4%) or White/non-Hispanic (55%)	666		1 : received PE either in person or via teleconference (32,1%)	109	Prolonged exposure (PE)	8 to 12 sessions (average 12,2 sessions ; SD=5,1 ; range 3-24)	90 minutes	weekly	1) psycho-education, 2) self-assessment of subjective anxiety, 3) in vivo exposure to external trauma reminders and objectively safe situations avoided due to exaggerated perceptions of threat, 4) repeated imaginal exposure to traumatic memories. Between sessions: in vivo exposures are repeated, weekly sesssions are audiotaped and reviewed as homework.	82% by licensed VA clinician, 18% by predoctoral psychology interns.	666	1	Baseline	Demographic questions, PCL-M, BDI-II (in 82 patients)	variable	at discretion of clinician	PCL-M	1	Postintervention	PCL-M
3	Currier, J. M., Holland, J. M., & Drescher, K. D. (2014). Residential treatment for combat-related posttraumatic stress disorder: identifying trajectories of change and predictors of treatment response. PLoS One, 9(7), e101741.	Currier, J. M., Holland, J. M., & Drescher, K. D.	2014	Military	USA	Archival data analysis	Between 2000 and 2007	Participants with severe PTSD who had not improved through other treatment options were refered by their clinician	Admissions from 2000 to 2007	666	666	666	1) having severe PTSD 2) being admitted to the inpatient treatment	1) active psychotic symptoms, 2) alcohol/drug misuse within the previous 14 days, 3) presence of a medical condition that would significantly interfere with/or prevent engagement in any treatment of activities/procedures.	805	Veterans Affairs PTSD Residential Rehabilitation Programs	PTSD	DSM IV	PCL-M	Combat related : majority from Vietnam and rest from Operation Enduring Freedom/Iraqi Freedom (4,2%)	666	666	Evaluated for physical health, mental health and substance abuse	666	SF-12 for physical and mental health, 18 item house instrument	666	89,1% male	51,53 years old (SD=8,03)	Caucasian (59,5%), African American (16,6%), Latino/a (14,7%), Asian American (2,2%), Native American (1,9%) and other minority groups (5,1%)	11,61 years (SD= 1,31)	Divorced (35,8%), separated (8%), married or living with their partner (32,1%), never married (18,4%), widows (5,7%).	1	805	Group cognitive behavioral format	60-90 day residential treatment	666	666	1) discussing traumas via exposure sessions, 2) anger management, 3) stress reduction, 4) communication skills, 5) psychoeducation, 6) parenting skills, 7) interpersonal process groups, 8) recreation therapy	666	666	1	Baseline	PCL-M, Combat Experience Scale (CES), Medical Outcomes Study Short Form (SF-12) and Substance abuse house questionnaire.	0	666	666	2	Postintervention and 4 month follow up	PCL-M
4	Elliott, P., Biddle, D., Hawthorne, G., Forbes, D., & Creamer, M. (2005). Patterns of treatment response in chronic posttraumatic stress disorder: An application of latent growth mixture modeling. Journal of traumatic stress, 18(4), 303-311.	Elliott, P., Biddle, D., Hawthorne, G., Forbes, D., & Creamer, M.	2005	Military	Australia	Archival data analysis	Between 1996 and 2002	Consecutive admissions to PTSD treatment programs	Between 1996 and 2002	666	666	666	1) PTSD diagnosis	1) diagnosed as psychotic, 2) actively suicidal or homicidal, 3) involved in a major life crisis	2219	Veterans Affairs PTSD Treatment programs	PTSD	Vérifier quel critères utilise le CAPS	CAPS	666	666	666	Evaluated for alcohol use disorders, anxiety, depression and anger issues.	666	Alcohol Use Disorders Identification Test, Hospital Anxiety and Depression Scale, US VA protocol (level of anger).	666	100% male	666	666	666	4,7% had never married, 16,4% were either widowed or separated and 78,9% were in a relationship or married at program intake	1	2219	Group cognitive behavioral format, inpatient our outpatient	up to 8 times a week for the first 4 weeks, 1-2 per week the next 8 weeks.	12 weeks	up to 8 times a week for the first 4 weeks, 1-2 per week the next 8 weeks.	1) psychoeducation 2) symptom management skills, 3) trauma exposure, 4) cognitive restructuring	666	666	1	Baseline	CAPS, PCL, Combat Exposure Scale, WHO Alcohol Use Disorders Identification Test, Hospital Anxiety and Depression, US VA protocol (anger level).	0	666	666	3	6 months, 12 months and 24 months postintervention	CAPS, PCL, Combat Exposure Scale, WHO Alcohol Use Disorders Identification Test, Hospital Anxiety and Depression, US VA protocol (anger level).
5	Fletcher, S., Elklit, A., Shevlin, M., & Armour, C. (2017). Predictors of PTSD treatment response trajectories in a sample of childhood sexual abuse survivors: the roles of social support, coping, and PTSD symptom clusters. Journal of interpersonal violence, 0886260517741212.	Fletcher, S., Elklit, A., Shevlin, M., & Armour, C.	2017	Civilian ; victims of childhood sexual abuse	Denmark	Archival data analysis	666	Treatment-seeking childhood sexual abuse survivors	666	666	666	666	1) PTSD diagnosis	1) presenting under the influence of alcohol or drugs, 2) with a personnality disorder characterized mainly by self-destructive behavior, 3) psychosis, 4) receving treatment elsewhere.	439	Treatment centers in Denmark	PTSD	DSM IV TR	Harvard Trauma Questionnaire	Childhood sexual abuse	22,2 years (SD=11,69)	666	666	666	666	666	85,8% female	36,46 years old (SD=10,83, range from 15-77)	100% caucasian	13,44 years (SD=3,51)	666	1	456	Personalized psychotherapy (can include cognitive, psychodynamic and behavioral treatments) matched to underlying personality features	No limit to the number of sessions	No limit to the number of sessions	Weekly	666	Psychologists	666	1	Baseline	Demographics, Traumatic events (house dichotomic questionnaire) characteristics, Harvard Trauma Questionnaire, Coping Skills Questionnaire, Crisis support scale.	0	666	666	3	6 months, 12 months and 18 months after baseline	Demographics, Traumatic events (house dichotomic questionnaire) characteristics, Harvard Trauma Questionnaire, Coping Skills Questionnaire, Crisis support scale.
6	Galovski, T. E., Harik, J. M., Blain, L. M., Farmer, C., Turner, D., & Houle, T. (2016). Identifying Patterns and Predictors of PTSD and Depressive Symptom Change During Cognitive Processing Therapy. Cognitive Therapy and Research, 40(5), 617-626.	Galovski, T. E., Harik, J. M., Blain, L. M., Farmer, C., Turner, D., & Houle, T.	2016	Civilian ; victims of interpersonal violence	USA	RCT	666	Recruited in St. Louis through word of mouth, flyers, and advertisements.	666	1 to 1 simple randomization	No	666	1) be at least 18 years old, 2) meet DSM IV criteria for PTSD following interpersonal violence, 3) trauma had to occur at least 3 months prior to the study.	1) being an abusive relationship, 2) if the participant has a history of drug or alcohol abuse, must be in remission for at least 6 months, 3) current mania, 4) current psychosis, 5) current severe suicidality, 6) psychiatric medications must be maintained stable during study	69	666	PTSD	DSM IV	CAPS	Interpersonal violence	666	666	Evaluated for depresion and personnality disorders	DSM IV	BDI-II and Schedule for Nonadaptive and Adaptive Personality (SNAP).	Blind experienced assessor		39,80 years old (SD= 11,74, range from 19 to 68)	Black (51%), White (42%), Latino (7%).	13,10 years (SD=2,78)	58% was single, 21% was married or living with someone, 21% was separated, divorced or widowed.	2 : Modified Cognitive Processing Therapy and Symptom-Monitoring Delyade Treatment	69 (because all completed treatment)	Cognitive Processing Therapy	Between 4 and 18 sessions	666	666	1) psychoeducation, 2) cognitive restructuring, 3) Socratic dialogue to resolve stuck points related to the trauma, 4) written trauma narrative	Master's-level clinicians	All sessions were videotaped and some were reviewed and given feedback, content was also rated by independent rators	1	Baseline	Posttraumatic Stress Diagnostic Scale (PDS), BDI-II, Schedule for Nonadaptive and Adaptive Personality (SNAP).	Many ; at every therapy session	At every therapy session	Posttraumatic Stress Diagnostic Scale (PDS) and BDI-II.	1	2 weeks Postintervention	Posttraumatic Stress Diagnostic Scale (PDS), BDI-II, Schedule for Nonadaptive and Adaptive Personality (SNAP).
7	Phelps, A. J., Steel, Z., Metcalf, O., Alkemade, N., Kerr, K., O'donnell, M., ... & Forbes, D. (2018). Key patterns and predictors of response to treatment for military veterans with post-traumatic stress disorder: a growth mixture modelling approach. Psychological medicine, 48(1), 95-103.	Phelps, A. J., Steel, Z., Metcalf, O., Alkemade, N., Kerr, K., O'donnell, M., ... & Forbes, D.	2018	Military	Australia	Achival data analysis	Between 2002 and 2015	Patients were not recruited, they participated in an accredited PTSD outpatient treatment funded by the Veterans Affairs Department.	Patients participated in a treatment program between 2002 and 2015.	666	666	666	1) have combat-related PTSD	1) being currently psychotic, 2) actively suicidal, 3) current substance abuse, 4) currently in a big life crisis.	2686	In an Accredited PTSD outpatient treatment program funded by the Australian Veteran's Affairs Department,.	PTSD	CAPS IV	DSM IV	Combat related PTSD	666	666	Examined for alcohol use, depression, anxiety, anger, guilt, dissociation and pain.	666	Alcohol Use Disorder Identification Test (alcohol use), Hospital Anxiety and Depression Scale (HADS ; depression and anxitey), Dimensions of Anger Reactions (DAR ; anger), WHOQOL-BREF (pain).	No eligilibity	98,8% male	55,92 years old (SD=10,54)	666	666	Single (3,9%), Married (70,1%), De facto (6,7%), Separated/Divorced (17,0%), Widowed (2,2%)	1 : PTSD treatment	2686	Individual and group therapy (6-10 participants)	20-30 treatment days	666	666	1) psychoeducation, 2) symptom management (for co-morbid problems including anxiety, anger and depression), 3) trauma-focused therapy, 4) graded in vivo exposure, 5) substance use issues, 6) interpersonal skills, 7) physical health and lifestyle issues, 8) relapse prevention	666	666	1	Baseline	PCL, Alcohol Use Disorder Identification Test (alcohol use), Hospital Anxiety and Depression Scale (HADS ; depression and anxitey), Dimensions of Anger Reactions (DAR ; anger), WHOQOL-BREF (pain), Abbreviated Dyadic Adjustment Scale (relationship satisfaction), CAPS IV associated features questions for guilt and dissociation.	0	666	666	3	Postintervention, 3 month and 9 month follow up.	PCL, Alcohol Use Disorder Identification Test (alcohol use), Hospital Anxiety and Depression Scale (HADS ; depression and anxitey), Dimensions of Anger Reactions (DAR ; anger), WHOQOL-BREF (pain), Abbreviated Dyadic Adjustment Scale (relationship satisfaction), CAPS IV associated features questions for guilt and dissociation.
8	Rosenkranz, S. E., & Muller, R. T. (2011). Outcome following inpatient trauma treatment: Differential response based on pre-treatment symptom severity. Psychological Trauma: Theory, Research, Practice, and Policy, 3(4), 453.	Rosenkranz, S. E., & Muller, R. T.	2011	Civilian ; adult survivors of childhood sexual abuse	Canada	Waitlist Comparison Group	666	Participants were recruited from the waitlist for a PTSD treatment program	666	666	666	666	1) PTSD diagnosis	1) current addiction, 2) current psychosis, 3) current active suicidality,	161	Program for traumatic Stress Recovery in a psychiatric hospital in Ontario	PTSD	DSM IV	CAPS	Adverse childhood experiences (80% experienced sexual abuse, 79% physical abuse, 33% domestic abuse). Traumas in adulthood (52% witnessed serious injury of violent death, 42% were involved in a serious accident, 41% were physically assaulted, 31% were sexually assaulted and 12% experienced military trauma).	666	666	Evaluated for depression, anxiety, borderline features and agression	666	Personnality Assessment Inventory (PAI)	Program clinicians	64% women	42,9 years old (SD=9,2)	91,9% European-Canadian, 4.5% Aboriginal, 1,8% African/Caribbean-Canadian, 0,9% as other.	Median education level : some university or college	41% were married	2 : waitlist and treatment (8 week inpatient voluntary treatment for adults with trauma histories).	141 completed treatment	Based on Bloom's Sanctuary model	666	8 weeks of inpatient treatment	daily	1) evaulation and establishing treatment goals (week 1), 2) psychoeducation, anxiety management and relaxation techniques, cognitive strategies and traumatic reenactment (weeks 2 - 7) 3) optional groups on art therapy, addiction awarness, loss, leisure connections, sexuality and intimacy, sleep and coping with anger (weeks 2 - 7) 4) discharge planning (week 8)	Psychiatrists, psychologists and social workers	Weekly clinical supervisions to maintain treatment fidelity	1	Baseline (3 days post admission)	Trauma Symptoms Checklist 40 (TSC-40) and its six subscales (Anxiety, Depression, Dissociation, Sleep Disturbance, Sexual Abuse Index and Sexual Problems), CAPS, Personnality Assessment Inventory (PAI) only subscales Anxiety, Depression, Borderline Features and Aggression.	0	666	666	2	Postintervention and 6 month follow up	Trauma Symptoms Checklist 40 (TSC-40) and its six subscales (Anxiety, Depression, Dissociation, Sleep Disturbance, Sexual Abuse Index and Sexual Problems) and CAPS.
9	Schumm, J. A., Walter, K. H., & Chard, K. M. (2013). Latent class differences explain variability in PTSD symptom changes during cognitive processing therapy for veterans. Psychological Trauma: Theory, Research, Practice, and Policy, 5(6), 536.	Schumm, J. A., Walter, K. H., & Chard, K. M.	2013	Military	USA	Archival data analysis	666	Patients were not recruited, they participated in an outpatient VA PTSD treatment	666	666	666	666	1) having attended at least 1 session of CPT in an outpatient VA PTSD treatment.	1) current substance dependence requiring detoxification, 2) active mania, 3) active psychosis, 4) active suicidal intent	205	666	PTSD	DSM IV TR	CAPS	69% had combat-related PTSD	666	666	MDD (66%), panic disorder (6%) and alcohol abuse (5%)	DSM IV TR	SCID	666	89% male	42,27 years old (SD= 14,42)	81% white	666	54% were married	1 : CPT	207	Cognitive Processing Therapy	12	666	666	1) psychoeducation, 2) cognitive restructuring, 3) Socratic dialogue to resolve stuck points related to the trauma, 4) written trauma narrative	Licensed psychiatrists, psychologists, social workers, nurse practitioners or supervised interns or residents.	Weekly clinical supervisions to maintain treatment fidelity	1	Baseline	Demographic questions, CAPS, PCL-S, BDI-II and SCID	12	Each week during CPT treatment	PCL-S	1	Within 2 weeks of last therapy session	Demographic questions, CAPS, PCL-S, BDI-II and SCID
10	Stein, N. R., Dickstein, B. D., Schuster, J., Litz, B. T., & Resick, P. A. (2012). Trajectories of response to treatment for posttraumatic stress disorder. Behavior Therapy, 43(4), 790-800.	Stein, N. R., Dickstein, B. D., Schuster, J., Litz, B. T., & Resick, P. A.	2012	Civilian ; female victims of interpersonal violence	USA	2 RCTs	666	Participants were recruited broadly throughout the St. Louis metropolitan area through referrals from victim assistance agencies, community therapists, flyers, newspaper advertisements, and word of mouth.	666	01:01:01	666	666	Study 1 : 1) at least one event of completed rape (oral, vaginal or anal) in childhood or adulthood, Study 2 : 1) must have experienced at least one event of sexual or physical assault in childhood or adulthood, For both : 2) be at least 3 months post-trauma, 3) meet criteria for PTSD at initial assessment, 4) be stable on any psychiatric medication	1) if the person has a substance dependence, must be abstinent for 6 months, 2) current psychosis, 3) current suicidal intent, 4) current dependence on drugs or alcohol, 5) illiteracy, 6) not currently in an abusive relationship, 7) not currently being stalked.	313	666	PTSD	DSM IV	CAPS and PDS	All were raped in chidlhood or adulthood (study 1) or sexually or physically assaulted in childhood or adulthood (study 2), In addition, 17% had been in a natural disaster, 42% had a serious accident where they were seriously injured or they felt their life was threatened, 11% had been exposed to dangerous chemicals or radiation, 27% had experienced other situations of serious injury or death, 41…	11,04 years (SD=12,26)	666	Examined for MDD, panic disorder and substance abuse disorders. 45% reported symptoms consistent with MDD and 15% consistent with PD. 4 participants had met criteria pour substance dependence in the last year (but not in the last 6 months.	DSM IV	SCID	666	100% female	33,60 years old (SD= 11,28)	65% Caucasian, 31% African American	14,10 years (SD=2,57)	48% single, 22% married or cohabitating, and 30% separated, divorced or widowed.	Study 1 ; 3 : CPT, PE or waitlist (all waitlist completed one other condition), Study 2 ; 3 : CPT, cognitive only version of CPT (CPT-C) or written account.		CPT or PE or CPT-C or WA	12	60 minutes	bi-weekly	666	Master's or Doctoral-level clinicians	Videotaped and rated	1	Baseline	Demographic questionnaire (from the Standardized Trauma Interview), Postraumatic Diagnosis Scale (PDS), CAPS, SCID, State Trait Anger Expression Inventory (STAXI), Trauma related Guilt Inventory (TFGI), Assessing Environments III (AE-III ; measures childhood physical abuse victimization), Sexual Abuse Exposure Questionnaire (SAEQ ; childhood sexual abuse)	6	weekly	PDS	2	Postintervention and follow up à (3 months for study 1 and 6 months for study 2).	PDS and CAPS
11	Taylor, S., Fedoroff, I. C., Koch, W. J., Thordarson, D. S., Fecteau, G., & Nicki, R. M. (2001). Posttraumatic stress disorder arising after road traffic collisions: Patterns of response to cognitive–behavior therapy. Journal of consulting and clinical psychology, 69(3), 541.	Taylor, S., Fedoroff, I. C., Koch, W. J., Thordarson, D. S., Fecteau, G., & Nicki, R. M.	2001	Civilian ; victims of childhood sexual abuse	Canada	Single group with repeated measures	666	Participants were recruited in the local media and from physician referrals.	666	666	666		1) having been diagnosed with Road-Traffic Collisions PTSD (RCT-PTSD), 2) be over 18 years old, 3) fluency in written and spoken English, 4) be willing to participate in a 12 week treatment program and complete the required assessments, 5) be willing to suspend concomitant psychological treatment and maintain psychotropic and analgesic medication doses constant.	1) having a mental retardation or psychotic disorder, 2) commencement of psychotropic medication or prescription analgesics within the last 3 months, 3) having a debilitating neurological impairment.	45	Clinic setting	Chronic PTSD	DSM IV	CAPS	All were involved in a RTC : 60% were drivers, 26% were passengers, 10% were pedestrians struck by a vehicule, 2% were motorcyclists and 2% were traumatized by the RTC befalling of a loved one.	2,4 years (SD = 2,6)	3,3 RTC (SD= 1,3)	36% MDD, PD/A (26%), specific phobia (18%), GAD (12%, pain disorder (8%), dysthymia (6%) and OCD (4%).	DSM IV	SCID	Clinic staff and reviewed by independent doctoral students	68% women	35,6 years old (SD= 10,3)	86% white, 10% asian and 4% others	80% had graduated from high school	36% single, 46% married or cohabitating, 18% were separated or divorced.	1 : group CBT	50	Group CBT (4-6 participants per group)	12	120 minutes	weekly	1) education, 2) applied relaxation, 3) imaginal exposure, 4) in vivo exposure.	Each group had two therapists, doctoral-level psychologists or a predoctoral intern.	Sessions were audio-taped and the progress was reviewed by other investigators	1	Baseline	SCID, CAPS (with supplemental items about dissociative symptoms and mental health consultations/medication), demographic questionnaire, PTSD Symptom Scale, Motor Vehicule Accident Scale, BDI, Multidimensional Pain Inventory, Anger Scale, Guilt Scale	12	weekly	Posttraumatic Symptom Scale	2	Postintervention and 3 month follow up	SCID, CAPS (with supplemental items about dissociative symptoms and mental health consultations/medication), PTSD Symptom Scale, Motor Vehicule Accident Scale, BDI, Multidimensional Pain Inventory, Anger Scale, Guilt Scale, Group Climate Questionnaire.
[truncated: 4 more columns]

## Sheet: Psychotherapy Details
First author (year)	Psychotherapy content
Allan (2017)	1) behavioral activation, 2) situational exposure and 3) imaginal exposure techniques
Clapp (2016)	1) psycho-education, 2) self-assessment of subjective anxiety, 3) in vivo exposure to external trauma reminders and objectively safe situations avoided due to exaggerated perceptions of threat, 4) repeated imaginal exposure to traumatic memories.
Currier (2014)	1) discussing traumas via exposure sessions, 2) anger management, 3) stress reduction, 4) communication skills, 5) psychoeducation, 6) parenting skills, 7) interpersonal process groups, 8) recreation therapy
Elliott (2005)	1) psychoeducation 2) symptom management skills, 3) trauma exposure, 4) cognitive restructuring
Fletcher (2017)	-
Galovski (2016)	1) psychoeducation, 2) cognitive restructuring, 3) Socratic dialogue to resolve stuck points related to the trauma, 4) written trauma narrative
Phelps (2018)	1) psychoeducation, 2) symptom management (for co-morbid problems including anxiety, anger and depression), 3) trauma-focused therapy, 4) graded in vivo exposure, 5) substance use issues, 6) interpersonal skills, 7) physical health and lifestyle issues, 8) relapse prevention
Rosenkranz (2011)	1) evaulation and establishing treatment goals (week 1), 2) psychoeducation, anxiety management and relaxation techniques, cognitive strategies and traumatic reenactment (weeks 2 - 7) 3) optional groups on art therapy, addiction awarness, loss, leisure connections, sexuality and intimacy, sleep and coping with anger (weeks 2 - 7) 4) discharge planning (week 8)
Schumm (2013)	1) psychoeducation, 2) cognitive restructuring, 3) Socratic dialogue to resolve stuck points related to the trauma, 4) written trauma narrative
Stein (2012)	-
Taylor (2001)	1) education, 2) applied relaxation, 3) imaginal exposure, 4) in vivo exposure.

## Sheet: Predictors Identification
Predictor	Allan (2017)	Clapp (2016)	Currier (2014)	Elliott (2005)	Fletcher (2017)	Galovski (2016)	Phelps (2018)	Rosenkranz (2011)	Schumm (2013)	Stein (2012)	Taylor (2001)
BASELINE DEMOGRAPHICS
Age	Age		Age	Age	Age	Age			Age	Age
Ethnicity	Race		Ethnicity			White race			% white	Race
						Hispanic ethnicity
Sex			Sex		Female				% male
Marital status	Married					Marital status single			% married	Marital Status
Education					Education					Years of education
Income						Income <$20,000
BASELINE CLINICAL PESENTATION
PTSD	PTSD	Initial PCL-M score and response profile	Pre-treatment PTSD	CAPS			PCL pre-tx	CAPS Total	Pre-tx CAPS		Chronic PTSD
	CAPS							TSC-40 Total	Pre-tx PCL
Reexperiencing					Reexperiencing			CAPS Re-experiencing		Reexperiencing symptoms	Reexperiencing
Hyperarousal					Hyperarousal			CAPS Hyperarousal		Hyperarousal symptoms	Hyperarousal
Avoidance					Avoidance			CAPS Avoidance		Effortful avoidance symptoms	Avoidance
Dissociation								TSC-40 Dissociation			Dissociative symptom severity
Numbing										Numbing symptoms	Numbing
Depression	BDI-II	Initial depressive symptoms and response profile	Mental health status	Depression			Depression	TSC-40 Depression	Pre-tx BDI-II	Diagnosis of MDD	Depression severity (BDI)
								PAI T Depression			Comorbid major depression
Anxiety	BAI			Anxiety				TSC-40 Anxiety			Comorbid panic disorder
								PAI T Anxiety
PD										Diagnosis of PD	Comorbid panic disorder
Anger				Anger							Anger about RTC
Substance abuse			Substance abuse	Alcohol use
Physical disability	Disabled		Physical health status								Receipt of disability assistance
Guilt							Guilt			Guilt cognitions	Guilt about RTC
Combat exposure			Combat exposure	Combat exposure					% combat as worst trauma
Social support	MOSS				Social support during trauma
					Social support at baseline
Time since trauma					Time since trauma						Time since target RTC (years)
Borderline personnality						Borderline		PAI T Borderline
Sexual abuse						Child sexual abuse index event		TSC-40 Sexual Assault Traumatic Index		Sexual abuse exposure questionnaire
						Adult sexual abuse index event
Physical abuse						Child physical abuse index event				AE-III (Physical punishement)
						Adult physical abuse index event
TREATMENT-RELATED
Treatment duration/number of sessions		Treatment duration and response profile							Total CPT sessions		No of treatment sessions attended
Type of treatment received	Treatment									Received prolonged exposure
										Received cognitive therapy only
										Received written accounts
POSTINTERVENTION CLINICAL PRESENTATION
PTSD post-treatment	CAPS post	Postintervention PCL score and response profile	Post-treatment PTSD				PCL post-tx		Post-tx PCL
									Post-tx CAPS
Depression post-treatment	BDI-II post								Post-tx BDI-II
PTSD at follow up	CAPS 3 month post		Follow-up PTSD				PCL 3 month

## Sheet: Trajectory Sizes
		Sample size	% of RE	% of NR	% of SB
1	Allan (2017)	231	0.1775	0.8225	0
2	Clapp (2016)	109	0.587	0.413	0
3	Currier (2014)	805	0	0.8981	0.1019
4	Elliott (2005)	2219	0	0.961	0.039
5	Fletcher (2017)	439	0.3303	0.5125	0.1571
6	Galovski (2016)	69	0.9276	0.0725	0.067
7	Phelps (2018)	2686	7.9%	0.854	0
8	Rosenkranz (2011)	161	0.814	0.186	0
9	Schumm (2013)	205	87%%	0.13	0
10	Stein (2012)	313	0	1	0
11	Taylor (2001)	45	84.15%	15.84%	0
		Mean	0.35455	0.58496	0.0331818
		SD	0.378449	0.365775	0.053817

## Sheet: Trajectory Data
First author (year)	Methodology	Assessments	Type of clinical population	# of trajectories	PTSD severity					Trajectory
					Measure	Cut-off score	av. at baseline	av. at post- intervention	Original name		%	Reclassified name	Summed %
Allan (2017)	Growth mixture modeling	Baseline, session 2, 4, 6, 8 and postintervention	Military	3	PCL-M	>50	55.70	35.19	Responders		15.15%	Responders 1	17.75%
							63.92	24.00	Immediate responders		2.60%	Responders 2
							58.11	52.35	Non-responders		82.25%	Non-responders	82.25%
Clapp (2016)	Latent-profile analysis	Baseline, at discretion of clinician and postintervention	Military	3	PCL-M	>50	63.25	28.30	Rapid responder		18.30%	Responders 1	58.70%
							62.09	39.52	Linear responder		40.40%	Responders 2
							62.60	53.07	Delayed responder		41.30%	Non-responders	41.30%
Currier (2014)	Latent class growth analysis	Baseline, postintervention and 4-month follow up	Military	3	PCL-M	>50	62.32	54.93	Improving Moderate PTSD		48.82%	Non-responders 1	89.81%
							72.59	69.11	Stable High PTSD		40.99%	Non-responders 2
							45.55	38.40	Stable Low PTSD		10.19%	Subclinical	10.19%
Elliott (2005)	Latent growth mixture modeling	Baseline, 6, 12 and 24 months postintervention	Military	3	PCL	>50	72.88	~ 63.88	Group 1		62.2%	Non-responders 1	96.1%
							60.73	~ 56.73	Group 2		33.9%	Non-responders 2
							44.14	~ 47.14	Group 3		3.9%	Subclinical	3.9%
Fletcher (2017)	Latent class growth analysis	Baseline, 6 months, 12 months and 18 months after baseline	Civilian; victims of CSA	4	HTQ	>40	42.58	36.3	Moderate PTSD gradual response		33.03%	Responders	33.03%
							48.17	44.83	High PTSD gradual response		36.22%	Non-responders 1	51.25%
							53.09	52.51	High PTSD treatment resistant		15.03%	Non-responders 2
							36.37	26.94	Moderate PTSD rapid response		15.71%	Subclinical	15.71%
Galovski (2016)	Latent class growth analysis	Baseline, at every therapy session and 2 weeks postintervention	Civilian; victims of interpersonal violence	3	PDS	>17	25.28	]0, 10[	Initial responders		47.83%	Responders 1	92.76%
							34.34	]10, 15[	Consistent responders		44.93%	Responders 2
							42.56	]30, 40[	Partial responders		7.25%	Non-responders	7.25%
First author (year)	Methodology	Assessments	Type of clinical population	# of trajectories	PTSD severity									Trajectory
					Measure		Cut-off score		av. at baseline		av. at postintervention		Original name			%	Reclassified name	Summed %
Phelps (2018)	Latent growth mixture modeling	Baseline, postintervention, 3 and 9-month follow up	Military	5	PCL		>50		63.13		43.48		High symptom extra-large change			7.9%	Responders	7.9%
									66.86		65.00		Very high symptom small change			32.5%	Non-responders 1	85.4%
									67.28		62.62		Very high symptom large change			3.0%	Non-responders 2
									59.93		53.24		High symptom large change			49.9%	Non-responders 3
									43.91		37.84		Low symptom large change			6.7%	Subclinical	6.7%
Rosenkranz (2011)	Latent class growth modelling	Baseline, postintervention and 6-month follow up	Civilian; adult survivors of CSA	3	TSC-40		-15		44.46		35.48		Group 1			47.52%	Responders 1	84.15%
									67.86		48.38		Group 2			36.63%	Responders 2
									70.88		70.81		Group 3			15.84%	Non-responders	15.84%
Schumm (2013)	Growth mixture modeling	Baseline, each week during CPT treatment, within two weeks of postintervention	Military	3	PCL-S		>50		57.88		35.78		Class 2			57.1%	Responders 1	81.4%
									49.32		24.14		Class 3			24.3%	Responders 2
									70.64		51.38		Class 1			18.6%	Non-responders	18.6%
Stein (2012)	Growth mixture modeling	Baseline, weekly, postintervention and follow up (3 or 6 months)	Civilian; female victims of interpersonal violence	2	PDS		>17		28.71		]0, 10[		Responders			0.87	Responders	0.87
									35.19		ns change		Non-responders			0.13	Non-responders	0.13
Taylor (2001)	Dynamic Cluster Analysis	Baseline, weekly, postintervention and 3-month follow up	Civilian; victims of road-accident	2	PSS		>17		]30, 35[		]20, 25[		Responders			0.6	Non-responders 1	1
								]35, 40[		]35, 40[		Partial responders			0.4		Non-responders 2

## Sheet: Allan (raw)
	Comparison of completers and non-completers					Comparison of baseline demographic characteristics, MOSS social support, and psychopathology symptoms between trajectories											Comparison of postintervention and 3 month, and 12 month follow up MOSS social support, and psychopathology symptoms between trajectories
		Completers	Non-completers			Baseline Predictors	Responders 1	SE	Nonresponders 2	SE	Immediate responders 3	SE	1 vs 2	1 vs 3	2 vs 3		Postintervention, 3 months post and 12 months post comparisons	Responders 1	SE	Nonresponders 2	SE	Immediate responders 3	SE	1 vs 2	1 vs 3	2 vs 3
	N	170	61			N	35		190		6						Postintervention
	Number of sessions	8	3,16 (SD = 1,57)			Treatment	0.528		0.462		0.47				p<0,001		MOSS	2.27	0.25	3.03	0.14	1.64	0.81	p<0,05
	Age	46,92 (SD= 14,67)	42,23 (SD= 15,06)	F(1,228) = 4,46, p<.05		Married	0.403		0.333		1						CAPS	9.4	1.61	21.65	1.17	-0.21	1.66	p<0,001	p<0,001	p<0,001
						Disabled	0.389		0.362		0.501						BAI	4.64	1.76	24.8	1.67	-0.52	2.54	p<0,001		p<0,001
						Race	0.607		0.466		0.422						BDI-II	7.41	2.34	24.38	1.43	-1.31	1.94	p<0,001	p<0,01	p<0,001
						PTSD	0.243		0.208		0.42						3 months
						Age	48.99	3.36	45.01	1.28	40.86	7.98					MOSS	2.43	0.28	3.03	0.13	1.24	0.35		p<0,01	p<0,001
						MOSS	2.64	0.26	2.98	0.12	1.98	0.76					CAPS	10.35	1.8	22.36	1.28	4.34	2.02	p<0,001	p<0,05	p<0,001
						CAPS	23.82	1.47	26.48	0.86	20.62	3.22					BAI	10.99	2.44	25.7	1.68	6.68	6.27	p<0,001		p<0,01
						BAI	17.15	3.47	26.44	1.23	15.2	3.11	p<0,05		p<0,001		BDI-II	12.53	2.27	24.65	1.46	4.34	5.06	p<0,001		p<0,001
						BDI-II	24.12	2.37	25.76	0.96	16.38	5.57					12 months
																	MOSS	2.59	0.32	3.27	0.16	1.31	0.25		p<0,01	p<0,001
																	CAPS	14.61	3.13	19.89	1.04	0.23	2.14		p<0,001	p<0,001
																	BAI	14.59	3.13	26.69	1.7	-1.26	2.42	p<0,01	p<0,001	p<0,001
																	BDI-II	20.09	3.38	23.84	1.45	-1.89	2.36		p<0,001	p<0,001

## Sheet: Clapp (raw)
	Overall response					Model implied change in PCL-M scores across responder profiles									Profile correlates
	Mean PCL-M score at intake	62.5	SD = 10,7			Assessment of change in PCL-M scores	Rapid responders	95% CI	Linear responders	95% CI	Delayed responders	95% CI			Variable	Comparison	Result
	Mean BDI-II score at intake	29 (moderate to severe)	SD =10,6			Week 2 - Week 1	-10.9		-5.2		-5.3				Treatment environment
	Mean duration of treatment	12,2 weeks	SD = 5,1 ; range = 3 - 24			Week 3 - Week 1	-14.3		-6		-1.3				Provider status (VA staff vs predoctoral intern) and response profile	x^2 2 = 1,14 ; p = 0,566 ; v = 0,102	No significant difference
	Mean reduction on the PCL-M from pre to post	-19.5	95% CI : -22,1 to -16,9	74,3% met criteria for reliable change		Week 4 - Week 1	-14.2		-4.7		-3.2				Treatment setting (in person vs telehealth) and response profile	x^2 2 = 4,27 ; p = 0,118 ; v = 0,198	No significant difference
						Week 5 - Week 1	-16.2		-10.5		-2.4				Clinical presentation
						Week 6 - Week 1	-29.3		-8.7		-0.1				Initial PCL-M score and response profile	F(2,106)= 0,08 ; p = 0,922 ; n^2 = 0,002	No significant difference
						Week 7 - Week 1	-29.2		-14.7		-2.2				Initial depressive symptoms and response profile	F(2,79)= 0,28 ; p = 0,754 ; n^2 = 0,007	No significant difference
						Week 8 - Week 1	-31.2		-15		-1.8				Treatment response
						Week 9 - Week 1	-35		-18.8		-3.4				Postintervention PCL score and response profile	F(3,106)= 30,83 ; p < 0,001 ; n^2 = 0,368	rapid responders (M=28,3 , SD=7,2) < linear responders (M=39,5 , SD=11) < delayed responders (M=53,1 , SD=15,1).
						Week 10 - Week 1	-37.2	[-45,4 ; -29,0]	-21.8	[-27,4 ; -16,2]	-3.4	[-8,9 ; 2,0]			Reliable change percentage and response profile	Fisher's exact P <0,001 ; V = 0,659	All of rapid responders, all of linear responders but one and 40% of delayed responders met criteria for reliable change.
															Treatment duration and response profile	F(3,104)=6,08 ; p = 0,003 ; n^2 = 0,103	Difference between rapid responders (M=9,6 , SD=3,6) and delayed responders (M=13,9 , SD=5,0) p=0,004, but no difference with linear responders (M=11,5 , SD=4,2).

## Sheet: Currier (raw)
	Comparison of Mean PTSD scores at pretreatment, post-treatment and follow up for the 3-class model (n=805)					Predictors of class membership
		Stable High PTSD	Improving Moderate PTSD	Stable Low PTSD		Predictors	Stable High PTSD vs Improving moderate PTSD			Stable low PTSD vs Improving moderate PTSD			Stable high PTSD vs Stable low PTSD
	N	330	393	82			B	SE	p	B	SE	p	B	SE	p
	%	0.48	0.41	0.1		Age	0.006	0.014	0.676	0.051	0.025	0.045	-0.045	0.026	0.081
	Pre-treatment PTSD	72.594	62.324	45.554		Sex	0.2	0.478	0.677	0.08	0.554	0.885	0.12	0.685	0.862
	Post-treatment PTSD	69.107	54.931	38.404		Ethnicity	-0.295	0.233	0.205	0.361	0.364	0.321	-0.656	0.379	0.083
	Follow-up PTSD	71.442	58.127	44.262		Combat exposure	0.022	0.011	0.055	-0.053	0.02	0.007	0.075	0.022	0.001
	Wald test : pre vs post	p<0,001	p<0,001	p<0,001		Physical health status	-0.046	0.014	0.001	0.056	0.018	0.002	-0.102	0.021	<0,001
	Pre-post cohen d	-0.42	-0.78	-0.77		Mental health status	-0.08	0.018	<0,001	0.089	0.02	<0,001	-0.169	0.025	<0,001
	Wald test : pre vs follow up		p<0,001			Substance abuse	0.011	0.007	0.154	-0.033	0.012	0.006	0.044	0.013	<0,001
	Pre-follow up cohen d	-0.15	-0.5	-0.13
	Wald test : post vs follow up	p<0,01	p<0,001	p<0,001
	Post-follow up cohen d	0.26	0.32	0.59
	Intercept	72.043	61.322	44.322
	p	p<0,001	p<0,001	p<0,001
	Slope	-0.672	-2.274	-0.859
	p	p=0.158	p<0,001	p=0,523
	Notes	Severe baseline PTSD that remained fairly stable.	Significantly declined from pre-treatment to follow up.	Low baseline PTSD that remained fairly stable.

[truncated: 8 more sheets: Elliott (raw), Fletcher (raw), Galovski (raw), Phelps (raw), Rosenkranz (raw), Schumm (raw), Stein (raw), Taylor (raw)]
